# Supplementary material
Source: PubMed Central journal article supplement (PMC2630264)
Supplement: blood-2008-04-149070_1.pdf [file blood-2008-04-149070_1.pdf]

| <b>Drugs interacting with warfarin</b>                                     | <b>ATC code</b> | <b>Decreased warfarin effect, INR↓</b> | <b>Increased warfarin effect, INR↑</b> | <b>Other inhibition of clotting</b> |
|----------------------------------------------------------------------------|-----------------|----------------------------------------|----------------------------------------|-------------------------------------|
| <b>Alimentary tract and metabolism</b>                                     |                 |                                        |                                        |                                     |
| cimetidine                                                                 | A02BA01         | 0                                      | 1                                      | 0                                   |
| omeprazole                                                                 | A02BC01         | 0                                      | 1                                      | 0                                   |
| lansoprazole                                                               | A02BC03         | 0                                      | 1                                      | 0                                   |
| esomeprazole                                                               | A02BC05         | 0                                      | 1                                      | 0                                   |
| sucralfate                                                                 | A02BX02         | 1                                      | 0                                      | 0                                   |
| lactulose                                                                  | A06AD11         | 0                                      | 1                                      | 0                                   |
| orlistat                                                                   | A08AB01         | 0                                      | 1                                      | 0                                   |
| acarbose                                                                   | A10BF01         | 0                                      | 1                                      | 0                                   |
| <b>Blood and blood forming organs</b>                                      |                 |                                        |                                        |                                     |
| dalteparine                                                                | B01AB04         | 0                                      | 0                                      | 1                                   |
| enoxaparin                                                                 | B01AB05         | 0                                      | 0                                      | 1                                   |
| nadroparin                                                                 | B01AB06         | 0                                      | 0                                      | 1                                   |
| tinzaparin                                                                 | B01AB10         | 0                                      | 0                                      | 1                                   |
| clopidogrel                                                                | B01AC04         | 0                                      | 0                                      | 1                                   |
| aspirin                                                                    | B01AC06         | 0                                      | 0                                      | 1                                   |
| dipyridamol                                                                | B01AC07         | 0                                      | 0                                      | 1                                   |
| iloprost                                                                   | B01AC11         | 0                                      | 0                                      | 1                                   |
| dipyridamol, aspirin                                                       | B01AC30         | 0                                      | 0                                      | 1                                   |
| vitamin K                                                                  | B02BA01         | 1                                      | 0                                      | 0                                   |
| <b>Cardiovascular system</b>                                               |                 |                                        |                                        |                                     |
| propafenone                                                                | C01BC03         | 0                                      | 1                                      | 0                                   |
| amiodarone                                                                 | C01BD01         | 0                                      | 1                                      | 0                                   |
| bosentan                                                                   | C02KX01         | 1                                      | 0                                      | 0                                   |
| propranolol                                                                | C07AA05         | 0                                      | 1                                      | 0                                   |
| simvastatin                                                                | C10AA01         | 0                                      | 1                                      | 0                                   |
| fluvastatin                                                                | C10AA04         | 0                                      | 1                                      | 0                                   |
| rosuvastatin                                                               | C10AA07         | 0                                      | 1                                      | 0                                   |
| bezafibrate                                                                | C10AB02         | 0                                      | 1                                      | 0                                   |
| gemfibrozil                                                                | C10AB04         | 0                                      | 1                                      | 0                                   |
| fenofibrate                                                                | C10AB05         | 0                                      | 1                                      | 0                                   |
| cholestyramine                                                             | C10AC01         | 1                                      | 0                                      | 0                                   |
| colestipol                                                                 | C10AC02         | 1                                      | 0                                      | 0                                   |
| <b>Dermatologicals</b>                                                     |                 |                                        |                                        |                                     |
| fusidic acid                                                               | D06AX01         | 0                                      | 1                                      | 0                                   |
| <b>Genito-urinary system and sex hormones</b>                              |                 |                                        |                                        |                                     |
| testosterone                                                               | G03BA03         | 0                                      | 1                                      | 0                                   |
| tolterodine                                                                | G04BD07         | 0                                      | 1                                      | 0                                   |
| <b>Systemic hormonal preparations, excluding sex hormones and insulins</b> |                 |                                        |                                        |                                     |
| levothyroxine                                                              | H03AA01         | 0                                      | 1                                      | 0                                   |
| <b>Anti-infectives for systemic use</b>                                    |                 |                                        |                                        |                                     |
| doxycycline                                                                | J01AA02         | 0                                      | 1                                      | 0                                   |

| <b>Drugs interacting with warfarin</b>            | <b>ATC code</b> | <b>Decreased warfarin effect, INR↓</b> | <b>Increased warfarin effect, INR↑</b> | <b>Other inhibition of clotting</b> |
|---------------------------------------------------|-----------------|----------------------------------------|----------------------------------------|-------------------------------------|
| lymecycline                                       | J01AA04         | 0                                      | 1                                      | 0                                   |
| amoxicillin                                       | J01CA04         | 0                                      | 1                                      | 0                                   |
| dicloxacillin                                     | J01CF01         | 1                                      | 0                                      | 0                                   |
| cloxacillin                                       | J01CF02         | 1                                      | 0                                      | 0                                   |
| flucloxacillin                                    | J01CF05         | 1                                      | 0                                      | 0                                   |
| amoxicillin, clavulanate                          | J01CR02         | 0                                      | 1                                      | 0                                   |
| trimethoprim                                      | J01EA01         | 0                                      | 1                                      | 0                                   |
| sulfamethoxazole, trimethoprim                    | J01EE01         | 0                                      | 1                                      | 0                                   |
| erythromycin                                      | J01FA01         | 0                                      | 1                                      | 0                                   |
| clarithromycin                                    | J01FA09         | 0                                      | 1                                      | 0                                   |
| azithromycin                                      | J01FA10         | 0                                      | 1                                      | 0                                   |
| ciprofloxacin                                     | J01MA02         | 0                                      | 1                                      | 0                                   |
| norfloxacin                                       | J01MA06         | 0                                      | 1                                      | 0                                   |
| moxifloxacin                                      | J01MA14         | 0                                      | 1                                      | 0                                   |
| fluconazole                                       | J02AC01         | 0                                      | 1                                      | 0                                   |
| rifampin                                          | J04AB02         | 1                                      | 0                                      | 0                                   |
| <b>Antineoplastic and immunomodulating agents</b> |                 |                                        |                                        |                                     |
| tamoxifen                                         | L02BA01         | 0                                      | 1                                      | 0                                   |
| cyclosporine                                      | L04AA01         | 1                                      | 0                                      | 0                                   |
| azathioprine                                      | L04AX01         | 1                                      | 0                                      | 0                                   |
| <b>Musculo-skeletal system</b>                    |                 |                                        |                                        |                                     |
| indometacine                                      | M01AB01         | 0                                      | 0                                      | 1                                   |
| sulindac                                          | M01AB02         | 0                                      | 0                                      | 1                                   |
| diclofenac                                        | M01AB05         | 0                                      | 0                                      | 1                                   |
| diclofenac, misoprostol                           | M01AB55         | 0                                      | 0                                      | 1                                   |
| meloxicam                                         | M01AC06         | 0                                      | 0                                      | 1                                   |
| ibuprofen                                         | M01AE01         | 0                                      | 0                                      | 1                                   |
| naproxen                                          | M01AE02         | 0                                      | 0                                      | 1                                   |
| ketoprofen                                        | M01AE03         | 0                                      | 0                                      | 1                                   |
| ibuprofen, codeine                                | M01AE51         | 0                                      | 0                                      | 1                                   |
| celecoxib                                         | M01AH01         | 0                                      | 1                                      | 1                                   |
| rofecoxib                                         | M01AH02         | 0                                      | 0                                      | 1                                   |
| valdecoxib                                        | M01AH03         | 0                                      | 0                                      | 1                                   |
| etoricoxib                                        | M01AH05         | 0                                      | 0                                      | 1                                   |
| nabumetone                                        | M01AX01         | 0                                      | 0                                      | 1                                   |
| glucosamine                                       | M01AX05         | 0                                      | 1                                      | 0                                   |
| orfenadrine, paracetamol                          | M03BC51         | 0                                      | 1                                      | 0                                   |
| allopurinol                                       | M04AA01         | 0                                      | 1                                      | 0                                   |
| <b>Nervous system</b>                             |                 |                                        |                                        |                                     |
| aspirin, codeine                                  | N02AA59         | 0                                      | 0                                      | 1                                   |
| paracetamol, codeine                              | N02AA59         | 0                                      | 1                                      | 0                                   |
| dextropropoxyphene, paracetamol                   | N02AC54         | 0                                      | 1                                      | 0                                   |

| Drugs interacting with warfarin                            | ATC code | Decreased warfarin effect, INR↓ | Increased warfarin effect, INR↑ | Other inhibition of clotting |
|------------------------------------------------------------|----------|---------------------------------|---------------------------------|------------------------------|
| tramadol                                                   | N02AX02  | 0                               | 1                               | 0                            |
| paracetamol                                                | N02BE01  | 0                               | 1                               | 0                            |
| phenobarbital                                              | N03AA02  | 1                               | 0                               | 0                            |
| phenytoin                                                  | N03AB02  | 1                               | 0                               | 0                            |
| carbamazepine                                              | N03AF01  | 1                               | 0                               | 0                            |
| valproic acid                                              | N03AG01  | 0                               | 0                               | 1                            |
| quetiapine                                                 | N05AH04  | 0                               | 1                               | 0                            |
| clomipramine                                               | N06AA04  | 0                               | 1                               | 0                            |
| fluoxetine                                                 | N06AB03  | 0                               | 1                               | 1                            |
| citalopram                                                 | N06AB04  | 0                               | 0                               | 1                            |
| paroxetine                                                 | N06AB05  | 0                               | 0                               | 1                            |
| sertraline                                                 | N06AB06  | 0                               | 0                               | 1                            |
| escitalopram                                               | N06AB10  | 0                               | 0                               | 1                            |
| mianserin                                                  | N06AX03  | 1                               | 0                               | 0                            |
| venlafaxine                                                | N06AX16  | 0                               | 0                               | 1                            |
| disulfiram                                                 | N07BB01  | 0                               | 1                               | 0                            |
| <b>Antiparasitic products, insecticides and repellents</b> |          |                                 |                                 |                              |
| metronidazol                                               | P01AB01  | 0                               | 1                               | 0                            |
| quinine                                                    | P01BC01  | 0                               | 1                               | 0                            |
| <b>Respiratory system</b>                                  |          |                                 |                                 |                              |
| noscapine                                                  | R05DA07  | 0                               | 1                               | 0                            |
| <b>Various</b>                                             |          |                                 |                                 |                              |
| mesna                                                      | V03AF01  | 0                               | 1                               | 0                            |
| <b>Dietary supplements, Herbal medications</b>             |          |                                 |                                 |                              |
| blueberry                                                  | -        | 0                               | 0                               | 1                            |
| evening primrose oil                                       | -        | 0                               | 0                               | 1                            |
| garlic                                                     | -        | 0                               | 1                               | 1                            |
| ginkgo biloba                                              | N06DX02  | 0                               | 0                               | 1                            |
| ginseng                                                    | -        | 0                               | 1                               | 1                            |
| omega-3-acid ethyl esters                                  | C10AX06  | 0                               | 1                               | 1                            |

**References:** The Swedish Drug Index,<sup>1</sup> the drug information databases Janusinfo,<sup>2</sup> Micromedex,<sup>3</sup> the Swedish Drug Information system,<sup>4</sup> Cytochrome P450 Enzyme system homepages,<sup>5,6</sup> selected drug interaction references,<sup>7-9</sup> and PubMed searches.
