# Supplementary material
Source: PubMed Central journal article supplement (PMC2630264)
Supplement: blood-2008-04-149070_2.pdf [file blood-2008-04-149070_2.pdf]

| Gene    | SNP (alias)               | MAF   | WARG R2 | P                           | Pilot R2 | P                          |
|---------|---------------------------|-------|---------|-----------------------------|----------|----------------------------|
| ABCB1   | rs3842                    | 0.137 | 0       | $9.47 \times 10^{-1}$       | 0.3      | $7.27 \times 10^{-1}$      |
| ABCB1   | rs2235040                 | 0.108 | 0.2     | $3.22 \times 10^{-1}$       | 0.3      | $7.39 \times 10^{-1}$      |
| ABCB1   | rs4148737                 | 0.453 | 0.1     | $6.99 \times 10^{-1}$       | 0.1      | $9.46 \times 10^{-1}$      |
| ABCB1   | rs2235046                 | 0.432 | 0       | $8.32 \times 10^{-1}$       | 0.3      | $7.75 \times 10^{-1}$      |
| ABCB1   | rs2235033                 | 0.493 | 0       | $7.47 \times 10^{-1}$       | 0.1      | $9.34 \times 10^{-1}$      |
| ABCB1   | rs1922240                 | 0.337 | 0       | $9.08 \times 10^{-1}$       | 0.3      | $7.47 \times 10^{-1}$      |
| ABCB1   | rs955000                  | 0.102 | 0.1     | $4.38 \times 10^{-1}$       | 1.3      | $3.05 \times 10^{-1}$      |
| ABCB1   | rs10260862                | 0.195 | 0.1     | $5.97 \times 10^{-1}$       | 0.3      | $8.00 \times 10^{-1}$      |
| ABCB1   | rs1202172                 | 0.351 | 0.1     | $5.50 \times 10^{-1}$       | 1.1      | $3.53 \times 10^{-1}$      |
| ABCB1   | rs9282564 (61A>G, N21D)   | 0.132 | 0.1     | $6.60 \times 10^{-1}$       | 0.2      | $8.57 \times 10^{-1}$      |
| ABCB1   | rs2214102 (-1G>A)         | 0.098 | 0       | $9.14 \times 10^{-1}$       | 3.3      | $8.61 \times 10^{-2}$      |
| ABCB1   | rs2214101                 | 0.064 | 0.1     | $6.55 \times 10^{-1}$       | 0        | $8.10 \times 10^{-1}$      |
| ABCB1   | rs10267099                | 0.239 | 0.3     | $1.41 \times 10^{-1}$       | 0.4      | $6.54 \times 10^{-1}$      |
| APOE    | rs429358 (C130R or C112R) | 0.173 | 0       | $9.68 \times 10^{-1}$       | 1.9      | $1.67 \times 10^{-1}$      |
| APOE    | rs7412 (R176C or R158C)   | 0.07  | 0       | $9.93 \times 10^{-1}$       | 1.2      | $3.59 \times 10^{-1}$      |
| CALU    | rs339057                  | 0.438 | 0.3     | $1.27 \times 10^{-1}$       | 2        | $1.33 \times 10^{-1}$      |
| CALU    | rs2060717                 | 0.062 | 0       | $7.62 \times 10^{-1}$       | 0.8      | $4.56 \times 10^{-1}$      |
| CALU    | rs339054                  | 0.468 | 0.4     | $9.03 \times 10^{-2}$       | 3.2      | $4.49 \times 10^{-2}$ *    |
| CALU    | rs2290228 (11 G>A, R4Q)   | 0.15  | 0.1     | $7.09 \times 10^{-1}$       | 0.5      | $6.34 \times 10^{-1}$      |
| CALU    | rs2307040 (A82V)          | 0.36  | 0.2     | $2.38 \times 10^{-1}$       | 3.3      | $3.81 \times 10^{-2}$ *    |
| CALU    | rs339098                  | 0.356 | 0.2     | $3.51 \times 10^{-1}$       | 3.2      | $5.88 \times 10^{-2}$      |
| CALU    | rs339095                  | 0.473 | 0.2     | $2.62 \times 10^{-1}$       | NA       | NA                         |
| CALU    | rs11653 (3'UTR 20943 T>A) | 0.391 | 0.3     | $1.81 \times 10^{-1}$       | 4.7      | $9.44 \times 10^{-3}$ **   |
| CALU    | rs8597                    | 0.07  | 0.1     | $5.01 \times 10^{-1}$       | 0.7      | $5.59 \times 10^{-1}$      |
| CYP1A1  | rs1048943                 | 0.026 | 0.3     | $2.14 \times 10^{-1}$       | 0.9      | $1.91 \times 10^{-1}$      |
| CYP1A1  | rs4646421                 | 0.081 | 0.1     | $6.75 \times 10^{-1}$       | 0.3      | $7.72 \times 10^{-1}$      |
| CYP1A1  | rs2606345                 | 0.317 | 0.3     | $1.83 \times 10^{-1}$       | 0.6      | $5.78 \times 10^{-1}$      |
| CYP1A1  | rs2470893                 | 0.342 | 0.7     | $1.49 \times 10^{-2}$ *     | 0.2      | $8.00 \times 10^{-1}$      |
| CYP1A2  | rs2069522                 | 0.032 | 0       | $9.85 \times 10^{-1}$       | NA       | NA                         |
| CYP1A2  | rs762551 (*1F)            | 0.27  | 0.2     | $3.41 \times 10^{-1}$       | 1.7      | $1.87 \times 10^{-1}$      |
| CYP1A2  | rs4646425                 | 0.019 | 0       | $8.55 \times 10^{-1}$       | 0.1      | $7.51 \times 10^{-1}$      |
| CYP1A2  | rs2470890 (*1B)           | 0.336 | 0.1     | $5.98 \times 10^{-1}$       | 1.2      | $3.15 \times 10^{-1}$      |
| CYP2C18 | rs2901783                 | 0.222 | 1.2     | $4.09 \times 10^{-4}$ ***   | 2.1      | $1.37 \times 10^{-1}$      |
| CYP2C18 | rs2860840                 | 0.388 | 0.1     | $5.53 \times 10^{-1}$       | 1.2      | $3.24 \times 10^{-1}$      |
| CYP2C19 | rs3814637                 | 0.073 | 7.1     | $3.14 \times 10^{-21}$ Meff | 10.6     | $2.19 \times 10^{-5}$ Meff |
| CYP2C19 | rs12248560                | 0.185 | 0.5     | $4.78 \times 10^{-2}$ *     | 2        | $1.63 \times 10^{-1}$      |
| CYP2C19 | rs17878459                | 0.035 | 0       | $9.24 \times 10^{-1}$       | NA       | NA                         |
| CYP2C19 | rs4244284                 | 0.45  | 0.1     | $4.94 \times 10^{-1}$       | 0.1      | $8.91 \times 10^{-1}$      |
| CYP2C19 | rs4244285 (*2A)           | 0.162 | 0.1     | $4.30 \times 10^{-1}$       | 0.5      | $6.33 \times 10^{-1}$      |
| CYP2C19 | rs4417205                 | 0.158 | 0.1     | $5.15 \times 10^{-1}$       | 0.9      | $4.67 \times 10^{-1}$      |
| CYP2C8  | rs1058932                 | 0.165 | 0.2     | $2.51 \times 10^{-1}$       | 0.7      | $5.20 \times 10^{-1}$      |
| CYP2C8  | rs10509681                | 0.093 | 3       | $3.08 \times 10^{-8}$ Meff  | 0.3      | $5.19 \times 10^{-1}$      |
| CYP2C8  | rs2275620                 | 0.417 | 1.6     | $7.99 \times 10^{-5}$ Meff  | 0.1      | $9.49 \times 10^{-1}$      |
| CYP2C8  | rs947173                  | 0.295 | 0.9     | $3.23 \times 10^{-3}$ **    | 1.2      | $3.07 \times 10^{-1}$      |
| CYP2C8  | rs1536430                 | 0.022 | 0.4     | $1.84 \times 10^{-2}$ *     | 2.4      | $3.14 \times 10^{-2}$ *    |
| CYP2C8  | rs1058930 (*4)            | 0.059 | 0       | $8.95 \times 10^{-1}$       | 0.3      | $7.55 \times 10^{-1}$      |
| CYP2C8  | rs11572080 (*3)           | 0.1   | 4.1     | $3.16 \times 10^{-12}$ Meff | 0.6      | $2.98 \times 10^{-1}$      |
| CYP2C8  | rs17110453 (*1C)          | 0.147 | 0.1     | $5.24 \times 10^{-1}$       | 1        | $3.82 \times 10^{-1}$      |
| CYP2C8  | rs1557044                 | 0.139 | 0.4     | $7.85 \times 10^{-2}$       | 0.7      | $5.13 \times 10^{-1}$      |

| Gene   | SNP (alias)                | MAF   | WARG R2 | P                           | Pilot R2 | P                          |
|--------|----------------------------|-------|---------|-----------------------------|----------|----------------------------|
| CYP2C9 | rs1799853 (*2)             | 0.114 | 4.1     | $1.34 \times 10^{-12}$ Meff | 0.6      | $5.77 \times 10^{-1}$      |
| CYP2C9 | rs2860905                  | 0.214 | 7.4     | $3.05 \times 10^{-22}$ Meff | 7.2      | $8.05 \times 10^{-4}$ ***  |
| CYP2C9 | rs2475376                  | 0.152 | 1       | $1.38 \times 10^{-3}$ **    | 2        | $1.33 \times 10^{-1}$      |
| CYP2C9 | rs4917639                  | 0.209 | 11.7    | $4.61 \times 10^{-30}$ Meff | 11.8     | $4.94 \times 10^{-6}$ Meff |
| CYP2C9 | rs1856908                  | 0.433 | 2.9     | $6.71 \times 10^{-9}$ Meff  | 0.6      | $5.31 \times 10^{-1}$      |
| CYP2C9 | rs9332197                  | 0.073 | 0.2     | $3.21 \times 10^{-1}$       | 0.1      | $9.29 \times 10^{-1}$      |
| CYP2C9 | rs1057910 (*3)             | 0.071 | 6.3     | $1.82 \times 10^{-19}$ Meff | 14.1     | $2.78 \times 10^{-7}$ Meff |
| CYP3A4 | GS30681                    | 0.069 | 0.1     | $4.70 \times 10^{-1}$       | 3        | $5.94 \times 10^{-2}$      |
| CYP3A4 | rs4986910                  | 0.008 | 0.4     | $1.85 \times 10^{-2}$ *     | NA       | NA                         |
| CYP3A4 | rs2242480                  | 0.087 | 0.2     | $3.68 \times 10^{-1}$       | 0.6      | $5.71 \times 10^{-1}$      |
| CYP3A4 | rs11773597 (*1F)           | 0.066 | 0.1     | $4.33 \times 10^{-1}$       | 0.3      | $4.53 \times 10^{-1}$      |
| CYP3A5 | rs4646457                  | 0.076 | 0.3     | $1.32 \times 10^{-1}$       | 0.3      | $7.72 \times 10^{-1}$      |
| CYP3A5 | rs6976017                  | 0.054 | 0.3     | $1.13 \times 10^{-1}$       | 0.9      | $4.36 \times 10^{-1}$      |
| CYP3A5 | rs28365083                 | 0.01  | 0.1     | $2.60 \times 10^{-1}$       | NA       | NA                         |
| CYP3A5 | rs28365094                 | 0.122 | 0.4     | $5.82 \times 10^{-2}$       | 0.9      | $4.39 \times 10^{-1}$      |
| CYP3A5 | rs4646453                  | 0.018 | 0       | $4.54 \times 10^{-1}$       | 1.8      | $7.14 \times 10^{-2}$      |
| CYP3A5 | rs776746 (*3)              | 0.073 | 0.4     | $9.65 \times 10^{-2}$       | 0.4      | $6.79 \times 10^{-1}$      |
| EPHX1  | rs4653436                  | 0.309 | 0.1     | $4.25 \times 10^{-1}$       | 4.8      | $8.48 \times 10^{-3}$ **   |
| EPHX1  | rs6426089                  | 0.496 | 0.5     | $3.59 \times 10^{-2}$ *     | 0.4      | $7.18 \times 10^{-1}$      |
| EPHX1  | rs2854461                  | 0.328 | 0.3     | $1.79 \times 10^{-1}$       | 0.5      | $6.37 \times 10^{-1}$      |
| EPHX1  | rs3753660                  | 0.144 | 0.2     | $3.36 \times 10^{-1}$       | 0.8      | $4.86 \times 10^{-1}$      |
| EPHX1  | rs3753661                  | 0.069 | 0       | $8.82 \times 10^{-1}$       | 1.1      | $1.46 \times 10^{-1}$      |
| EPHX1  | rs2671272                  | 0.21  | 0.1     | $6.76 \times 10^{-1}$       | 0.5      | $6.21 \times 10^{-1}$      |
| EPHX1  | rs2671270                  | 0.254 | 0.2     | $2.94 \times 10^{-1}$       | 1        | $4.01 \times 10^{-1}$      |
| EPHX1  | rs3817268                  | 0.274 | 0.8     | $6.47 \times 10^{-3}$ **    | 0.6      | $5.50 \times 10^{-1}$      |
| EPHX1  | rs1051740 (612 T>C, Y113H) | 0.294 | 0.2     | $2.77 \times 10^{-1}$       | 0        | $9.94 \times 10^{-1}$      |
| EPHX1  | rs2292566                  | 0.132 | 0.1     | $4.20 \times 10^{-1}$       | 0.7      | $5.41 \times 10^{-1}$      |
| EPHX1  | rs2260863                  | 0.3   | 0       | $8.60 \times 10^{-1}$       | 0.7      | $6.07 \times 10^{-1}$      |
| EPHX1  | rs2740170                  | 0.201 | 0       | $7.80 \times 10^{-1}$       | 0.3      | $7.83 \times 10^{-1}$      |
| EPHX1  | rs4149223                  | 0.468 | 0.1     | $5.77 \times 10^{-1}$       | 1.3      | $3.41 \times 10^{-1}$      |
| EPHX1  | rs2234922 (691A>G, H139R)  | 0.213 | 0       | $9.16 \times 10^{-1}$       | 3.4      | $5.21 \times 10^{-2}$      |
| EPHX1  | rs2292567                  | 0.101 | 0.1     | $7.21 \times 10^{-1}$       | 2.7      | $1.07 \times 10^{-1}$      |
| EPHX1  | rs1051741                  | 0.103 | 0       | $8.51 \times 10^{-1}$       | 1.6      | $2.06 \times 10^{-1}$      |
| EPHX1  | rs3753663                  | 0.047 | 0.1     | $4.76 \times 10^{-1}$       | 0.5      | $3.20 \times 10^{-1}$      |
| EPHX1  | rs2102663                  | 0.157 | 0.1     | $6.01 \times 10^{-1}$       | 0.2      | $5.14 \times 10^{-1}$      |
| F10    | rs3093261                  | 0.427 | 0.3     | $1.52 \times 10^{-1}$       | 0.3      | $7.55 \times 10^{-1}$      |
| F10    | rs3212998                  | 0.064 | 0       | $8.93 \times 10^{-1}$       | 0.1      | $6.05 \times 10^{-1}$      |
| F10    | rs776905                   | 0.103 | 0       | $7.74 \times 10^{-1}$       | 2.4      | $1.03 \times 10^{-1}$      |
| F10    | rs693335                   | 0.405 | 0.1     | $5.86 \times 10^{-1}$       | 1.1      | $3.77 \times 10^{-1}$      |
| F10    | rs3211764                  | 0.465 | 0.2     | $2.28 \times 10^{-1}$       | 0.5      | $6.33 \times 10^{-1}$      |
| F10    | rs2251102                  | 0.192 | 0.5     | $4.82 \times 10^{-2}$ *     | 0.6      | $6.26 \times 10^{-1}$      |
| F10    | rs2026160                  | 0.3   | 0.2     | $2.31 \times 10^{-1}$       | 0.4      | $7.03 \times 10^{-1}$      |
| F10    | rs753057                   | 0.052 | 0.1     | $6.92 \times 10^{-1}$       | 3.1      | $4.52 \times 10^{-2}$ *    |
| F10    | rs3213005                  | 0.043 | 0.1     | $5.61 \times 10^{-1}$       | 3        | $1.85 \times 10^{-2}$ *    |
| F10    | rs5960 (T264T)             | 0.135 | 0.2     | $2.11 \times 10^{-1}$       | 1.9      | $1.84 \times 10^{-1}$      |
| F2     | rs3136435                  | 0.071 | 0.2     | $3.40 \times 10^{-1}$       | 0.4      | $7.20 \times 10^{-1}$      |
| F2     | rs2070851                  | 0.22  | 0.2     | $3.14 \times 10^{-1}$       | 2.9      | $5.75 \times 10^{-2}$      |
| F2     | rs2070852                  | 0.301 | 0       | $8.46 \times 10^{-1}$       | 0.9      | $4.24 \times 10^{-1}$      |
| F2     | rs5898                     | 0.092 | 0.5     | $5.17 \times 10^{-2}$       | 2.6      | $7.62 \times 10^{-2}$      |

| Gene  | SNP (alias)              | MAF   | WARG R2 | P                     | Pilot R2 | P                     |
|-------|--------------------------|-------|---------|-----------------------|----------|-----------------------|
| F2    | rs2282687                | 0.131 | 0       | $7.48 \times 10^{-1}$ | 0.9      | $4.15 \times 10^{-1}$ |
| F2    | rs3136516                | 0.449 | 0       | $8.63 \times 10^{-1}$ | 0.8      | $4.40 \times 10^{-1}$ |
| F5    | rs9332618                | 0.133 | 0.1     | $4.03 \times 10^{-1}$ | 0.7      | $5.11 \times 10^{-1}$ |
| F5    | rs4656687                | 0.321 | 0       | $7.48 \times 10^{-1}$ | NA       | NA                    |
| F5    | rs1557572                | 0.315 | 0       | $8.13 \times 10^{-1}$ | 0.2      | $8.14 \times 10^{-1}$ |
| F5    | rs6018                   | 0.058 | 0       | $8.05 \times 10^{-1}$ | 0.6      | $5.75 \times 10^{-1}$ |
| F5    | rs6037                   | 0.068 | 0       | $8.09 \times 10^{-1}$ | 0.2      | $8.01 \times 10^{-1}$ |
| F5    | rs3766110                | 0.229 | 0.1     | $5.33 \times 10^{-1}$ | 0        | $9.99 \times 10^{-1}$ |
| F5    | rs6025 (Leiden R534Q)    | 0.066 | 0.3     | $1.42 \times 10^{-1}$ | 0.8      | $4.92 \times 10^{-1}$ |
| F5    | rs2298909                | 0.303 | 0.1     | $5.26 \times 10^{-1}$ | 1.5      | $3.14 \times 10^{-1}$ |
| F5    | rs721161                 | 0.387 | 0       | $7.48 \times 10^{-1}$ | 0.6      | $5.69 \times 10^{-1}$ |
| F5    | rs6035                   | 0.076 | 0.1     | $4.87 \times 10^{-1}$ | 1        | $1.83 \times 10^{-1}$ |
| F5    | rs6427198                | 0.478 | 0.1     | $4.44 \times 10^{-1}$ | 0.1      | $8.99 \times 10^{-1}$ |
| F5    | rs1894699                | 0.49  | 0       | $8.65 \times 10^{-1}$ | 1.8      | $2.00 \times 10^{-1}$ |
| F5    | rs6029                   | 0.164 | 0.1     | $4.01 \times 10^{-1}$ | 0.7      | $5.16 \times 10^{-1}$ |
| F5    | rs2298905                | 0.301 | 0.1     | $5.81 \times 10^{-1}$ | 1.4      | $3.00 \times 10^{-1}$ |
| F5    | rs9332504                | 0.074 | 0.2     | $3.50 \times 10^{-1}$ | 1.2      | $2.95 \times 10^{-1}$ |
| F5    | rs3753305                | 0.441 | 0.1     | $5.27 \times 10^{-1}$ | 2.8      | $8.23 \times 10^{-2}$ |
| F7    | rs3093229                | 0.24  | 0       | $9.34 \times 10^{-1}$ | 1.9      | $1.59 \times 10^{-1}$ |
| F7    | rs3093230                | 0.254 | 0.1     | $6.97 \times 10^{-1}$ | 2.9      | $6.84 \times 10^{-2}$ |
| F7    | rs2774030                | 0.371 | 0       | $7.98 \times 10^{-1}$ | 0.3      | $7.66 \times 10^{-1}$ |
| F7    | rs6041                   | 0.101 | 0.4     | $9.56 \times 10^{-1}$ | 0.7      | $4.97 \times 10^{-1}$ |
| F7    | rs6046 (1289 G>A, R413Q) | 0.103 | 0.1     | $4.01 \times 10^{-1}$ | 1.2      | $3.26 \times 10^{-1}$ |
| F9    | rs3817939                | 0.02  | 0.1     | $5.85 \times 10^{-1}$ | 1.2      | $3.17 \times 10^{-1}$ |
| F9    | rs401597                 | 0.283 | 0.3     | $1.72 \times 10^{-1}$ | 1.5      | $2.57 \times 10^{-1}$ |
| F9    | rs6048                   | 0.282 | 0.4     | $7.55 \times 10^{-2}$ | 0.6      | $5.68 \times 10^{-1}$ |
| F9    | rs413536                 | 0.2   | 0.2     | $2.19 \times 10^{-1}$ | 0.5      | $6.28 \times 10^{-1}$ |
| GAS6  | rs7997328                | 0.287 | 0.3     | $2.04 \times 10^{-1}$ | 0.6      | $5.70 \times 10^{-1}$ |
| GAS6  | rs6602908                | 0.395 | 0.1     | $6.23 \times 10^{-1}$ | 2.1      | $1.42 \times 10^{-1}$ |
| GAS6  | rs9577874                | 0.408 | 0.1     | $7.14 \times 10^{-1}$ | 0.1      | $8.74 \times 10^{-1}$ |
| GGCX  | rs2028898                | 0.275 | 0.1     | $5.00 \times 10^{-1}$ | 2.7      | $7.40 \times 10^{-2}$ |
| GGCX  | rs7568458                | 0.451 | 0.1     | $4.97 \times 10^{-1}$ | 0.7      | $5.09 \times 10^{-1}$ |
| NQO1  | rs1800566                | 0.17  | 0.2     | $2.86 \times 10^{-1}$ | 0.5      | $6.55 \times 10^{-1}$ |
| NQO1  | rs689453                 | 0.077 | 0.2     | $3.11 \times 10^{-1}$ | 0.3      | $4.76 \times 10^{-1}$ |
| NQO1  | rs2917671                | 0.116 | 0       | $9.06 \times 10^{-1}$ | 2.9      | $6.69 \times 10^{-2}$ |
| NR1I2 | rs2276706                | 0.401 | 0.4     | $9.34 \times 10^{-2}$ | 0.6      | $5.78 \times 10^{-1}$ |
| NR1I2 | rs2056530                | 0.191 | 0.1     | $4.37 \times 10^{-1}$ | 2        | $1.72 \times 10^{-1}$ |
| NR1I2 | rs2472677                | 0.399 | 0.1     | $6.77 \times 10^{-1}$ | 3.9      | $5.93 \times 10^{-2}$ |
| NR1I2 | rs2461818                | 0.096 | 0.1     | $7.03 \times 10^{-1}$ | 0.7      | $2.62 \times 10^{-1}$ |
| NR1I2 | rs7643645                | 0.352 | 0.3     | $1.65 \times 10^{-1}$ | 2.9      | $6.81 \times 10^{-2}$ |
| NR1I2 | rs12721607               | 0.028 | 0       | $8.03 \times 10^{-1}$ | 0        | $9.52 \times 10^{-1}$ |
| NR1I2 | rs1464602                | 0.392 | 0.1     | $4.93 \times 10^{-1}$ | 2.6      | $1.12 \times 10^{-1}$ |
| NR1I2 | rs3732356                | 0.067 | 0.3     | $2.07 \times 10^{-1}$ | 0.7      | $4.99 \times 10^{-1}$ |
| NR1I2 | rs3732357                | 0.34  | 0.1     | $6.30 \times 10^{-1}$ | 0.8      | $4.73 \times 10^{-1}$ |
| NR1I2 | rs2472682                | 0.385 | 0       | $8.22 \times 10^{-1}$ | 0.5      | $6.25 \times 10^{-1}$ |
| NR1I2 | rs3732359                | 0.261 | 0.1     | $4.02 \times 10^{-1}$ | 0.5      | $6.24 \times 10^{-1}$ |
| NR1I2 | rs1054191                | 0.153 | 0.1     | $6.45 \times 10^{-1}$ | 0.2      | $8.69 \times 10^{-1}$ |
| NR1I2 | rs3814057                | 0.199 | 0.1     | $6.74 \times 10^{-1}$ | 1.7      | $2.03 \times 10^{-1}$ |
| NR1I3 | rs4233368                | 0.263 | 0.3     | $1.39 \times 10^{-1}$ | 0        | $9.59 \times 10^{-1}$ |

| Gene     | SNP (alias)           | MAF   | WARG R2 | P                        | Pilot R2 | P                         |
|----------|-----------------------|-------|---------|--------------------------|----------|---------------------------|
| NR1I3    | rs4073054             | 0.362 | 0.1     | $4.60 \times 10^{-1}$    | 0.9      | $5.50 \times 10^{-1}$     |
| NR1I3    | rs2307418             | 0.161 | 0       | $9.94 \times 10^{-1}$    | 0.6      | $5.57 \times 10^{-1}$     |
| NR1I3    | rs2307420             | 0.023 | 0       | $8.50 \times 10^{-1}$    | 0.3      | $4.16 \times 10^{-1}$     |
| NR1I3    | rs2307424             | 0.357 | 0.2     | $3.14 \times 10^{-1}$    | 2.7      | $9.84 \times 10^{-2}$     |
| NR1I3    | rs3003596             | 0.445 | 0       | $8.96 \times 10^{-1}$    | 2.2      | $1.40 \times 10^{-1}$     |
| NR1I3    | rs6686001             | 0.135 | 0       | $7.46 \times 10^{-1}$    | 3.4      | $5.05 \times 10^{-2}$     |
| ORM1     | rs2787337             | 0.311 | 0.7     | $1.08 \times 10^{-2} *$  | 0        | $9.63 \times 10^{-1}$     |
| ORM1     | rs10982151            | 0.136 | 0.5     | $5.18 \times 10^{-2}$    | 0.9      | $2.00 \times 10^{-1}$     |
| ORM1     | rs1687390             | 0.044 | 0       | $9.14 \times 10^{-1}$    | 2.6      | $4.96 \times 10^{-2} *$   |
| ORM2     | rs17230081            | 0.199 | 0       | $8.84 \times 10^{-1}$    | 0.4      | $7.03 \times 10^{-1}$     |
| PROC     | rs2069901             | 0.435 | 0.1     | $6.21 \times 10^{-1}$    | 7.2      | $1.47 \times 10^{-3} **$  |
| PROC     | rs1799809 (-1644 G>A) | 0.438 | 0       | $9.53 \times 10^{-1}$    | 7.8      | $5.50 \times 10^{-4} ***$ |
| PROC     | rs2069910             | 0.425 | 0       | $7.33 \times 10^{-1}$    | 4.6      | $1.68 \times 10^{-2} *$   |
| PROC     | rs2069919             | 0.373 | 0.2     | $2.07 \times 10^{-1}$    | 9        | $2.16 \times 10^{-4} ***$ |
| PROC     | rs5936                | 0.276 | 0.1     | $3.95 \times 10^{-1}$    | 2        | $1.47 \times 10^{-1}$     |
| PROC     | rs2069928             | 0.18  | 0       | $7.69 \times 10^{-1}$    | 0.7      | $5.07 \times 10^{-1}$     |
| PROC     | rs2069933             | 0.279 | 0.2     | $2.59 \times 10^{-1}$    | 2.5      | $9.06 \times 10^{-2}$     |
| PROS1    | rs9683303             | 0.353 | 0.6     | $3.26 \times 10^{-2} *$  | 0.1      | $8.90 \times 10^{-1}$     |
| PROS1    | rs8178633             | 0.05  | 0.8     | $7.03 \times 10^{-3} **$ | 0.5      | $3.81 \times 10^{-1}$     |
| PROS1    | rs4857037             | 0.076 | 0       | $8.58 \times 10^{-1}$    | 1.5      | $2.96 \times 10^{-1}$     |
| PROS1    | rs4857343             | 0.142 | 0.1     | $6.20 \times 10^{-1}$    | 1.7      | $1.97 \times 10^{-1}$     |
| PROS1    | rs8178610             | 0.496 | 0       | $9.18 \times 10^{-1}$    | 0.2      | $8.39 \times 10^{-1}$     |
| PROS1    | rs8178607             | 0.244 | 0       | $8.65 \times 10^{-1}$    | 0.5      | $6.15 \times 10^{-1}$     |
| PROS1    | rs5013930             | 0.122 | 0.3     | $1.74 \times 10^{-1}$    | 0.9      | $4.05 \times 10^{-1}$     |
| PROZ     | rs2273971             | 0.062 | 0.2     | $2.91 \times 10^{-1}$    | 0.1      | $8.76 \times 10^{-1}$     |
| PROZ     | rs3024718             | 0.175 | 0.1     | $7.16 \times 10^{-1}$    | 1.5      | $2.26 \times 10^{-1}$     |
| PROZ     | rs2480948             | 0.204 | 0       | $8.19 \times 10^{-1}$    | 2.7      | $6.98 \times 10^{-2}$     |
| PROZ     | rs3024746             | 0.206 | 0.1     | $5.68 \times 10^{-1}$    | 1        | $3.94 \times 10^{-1}$     |
| SERPINC1 | rs2759328             | 0.092 | 0.1     | $3.79 \times 10^{-1}$    | 1.7      | $1.83 \times 10^{-1}$     |
| SERPINC1 | rs5878                | 0.3   | 0.1     | $3.83 \times 10^{-1}$    | 0.5      | $6.00 \times 10^{-1}$     |
| SERPINC1 | rs2227607             | 0.101 | 0.1     | $4.40 \times 10^{-1}$    | 0.7      | $5.11 \times 10^{-1}$     |
| SERPINC1 | rs2227590             | 0.099 | 0.4     | $6.01 \times 10^{-2}$    | 0.2      | $8.04 \times 10^{-1}$     |
|          |                       |       |         | $2.55 \times 10^{-5}$    |          |                           |
| VKORC1   | rs11150606            | 0.027 | 1.3     | Meff                     | 2.5      | $2.67 \times 10^{-2} *$   |
|          |                       |       |         | $1.21 \times 10^{-37}$   |          | $4.14 \times 10^{-10}$    |
| VKORC1   | rs7294 (3730 G>A)     | 0.393 | 12.3    | Meff                     | 20.8     | Meff                      |
|          |                       |       |         | $9.82 \times 10^{-100}$  |          | $2.30 \times 10^{-15}$    |
| VKORC1   | rs2359612 (2255 C>T)  | 0.394 | 29.8    | Meff                     | 29       | Meff                      |
|          |                       |       |         | $1.03 \times 10^{-97}$   |          | $1.91 \times 10^{-15}$    |
| VKORC1   | rs9923231 (-1639 G>A) | 0.393 | 29.3    | Meff                     | 31.7     | Meff                      |
